# Supplementary material
Source: publisher figshare collection journal article supplement (https://tandf.figshare.com/articles/dataset/_/4039740)
Supplement: Supplementary file 1 [file 2]

Figure S1. Mean style length scores of non-pollinated and self-pollinated florets at time of treatment (0 h) and at intervals of 6, 22, 24, and 48 h afterwards for the non-radiate (top) and radiate (bottom) variants of *Senecio vulgaris.*
